# Supplementary material for: Synthesis and characterization of new Pd(ii) and Pt(ii) complexes with 3-substituted 1-(2-pyridyl)imidazo[1,5-a]pyridine ligands
Source: Royal Society of Chemistry journal article supplement (doi:10.1039/d1dt00546d), 2021-01-01
Supplement: d1dt00546d1.pdf [file d1dt00546d1.pdf]

**Synthesis and characterization of new Pd(II) and Pt(II) complexes with 3-substituted 1-(2-pyridyl)imidazo[1,5-*a*]pyridine ligands.**

Sara Pischedda,<sup>a,b</sup> Sergio Stoccoro,<sup>a,b</sup> \* Antonio Zucca,<sup>a,b</sup> Giuseppe Sciortino,<sup>c</sup> Fabrizio Ortu<sup>d,e</sup> and Guy Clarkson<sup>f</sup>

- a) Dipartimento di Chimica e Farmacia, Università degli Studi di Sassari, via Vienna 2, 07100 Sassari, Italy
- b) Consorzio Interuniversitario Reattività Chimica e Catalisi (CIRCC), Bari, Italy
- c) Institute of Chemical Research of Catalonia (ICIQ), Av. Països Catalans 16, 43007 Tarragona, Spain
- d) School of Chemistry, University of Leicester, University Road, Leicester, LE1 7RH, UK
- e) Department of Chemistry, University of Manchester, Oxford Road, Manchester, M13 9 PL, UK
- f) Department of Chemistry, University of Warwick, Gibbet Hill Road, Coventry CV4 7AL, UK

\* E-mail: [stoccoro@uniss.it](mailto:stoccoro@uniss.it)

- 1. NMR data**
- 2. Crystallography**
- 3. Computational details**
- 4. References**

## 1. NMR data

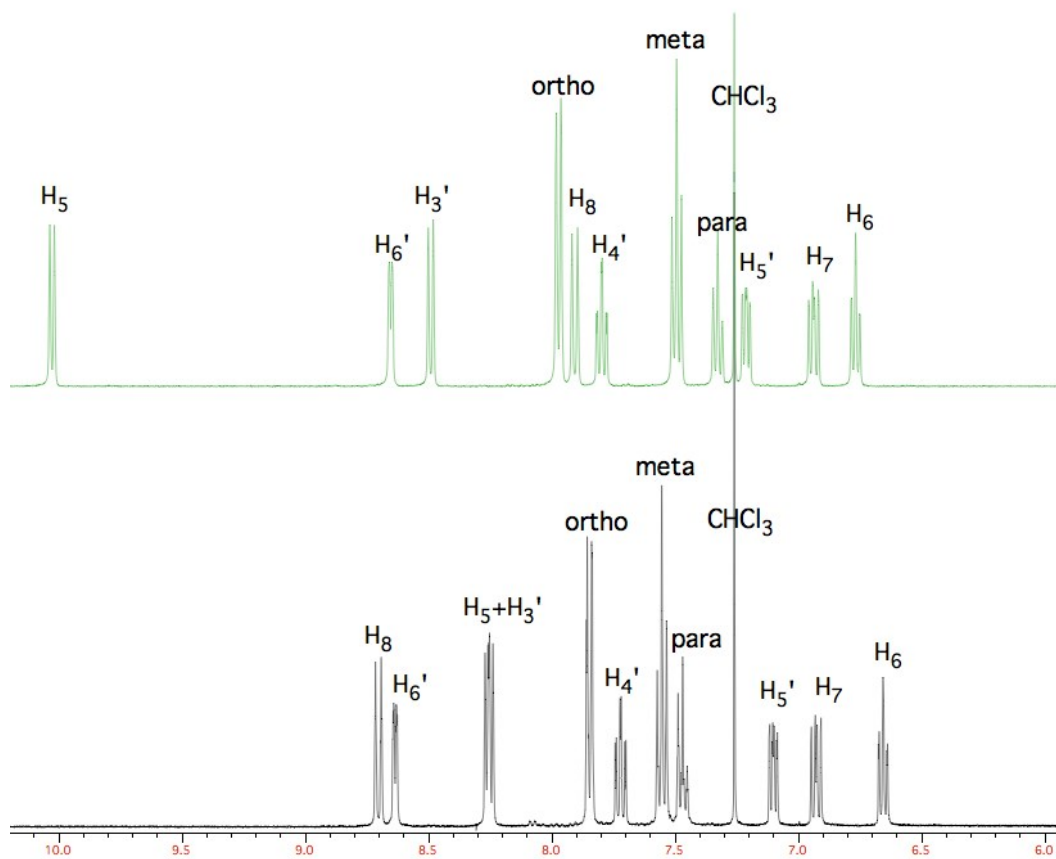**Figure S1.**  $^1\text{H}$  NMR spectra of  $L^1$  (down) and  $L^1$  isomer (upper)

# Supporting Information

## $^1\text{H}$ NMR spectrum of $\text{L}^1$ in $\text{CDCl}_3$

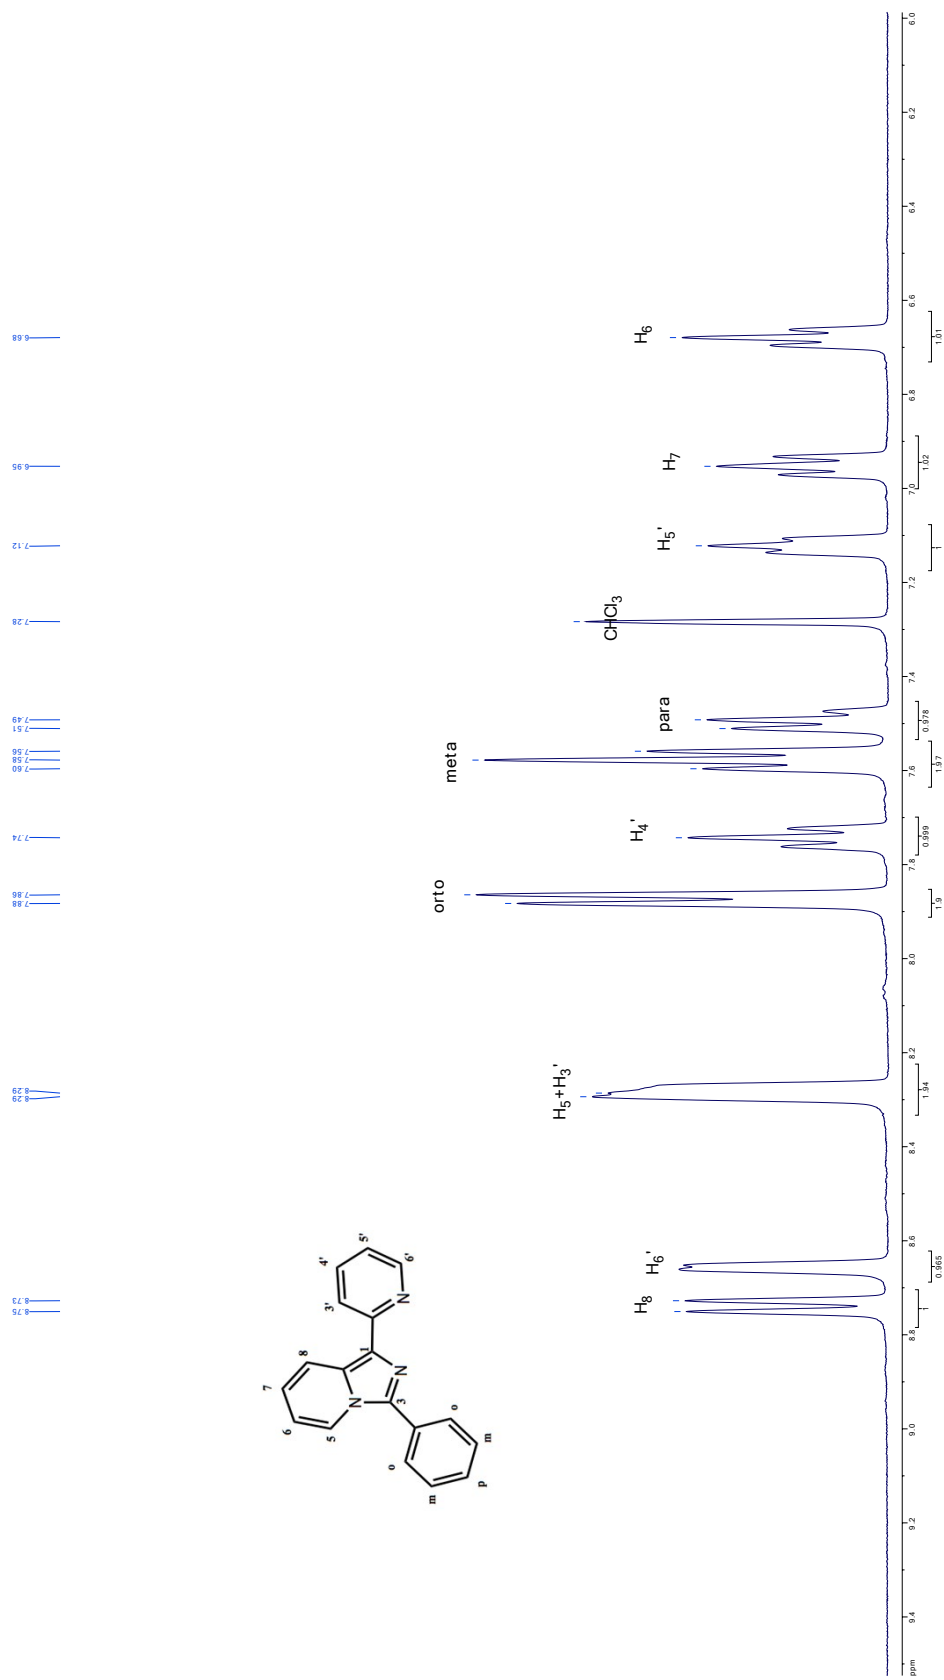

# Supporting Information

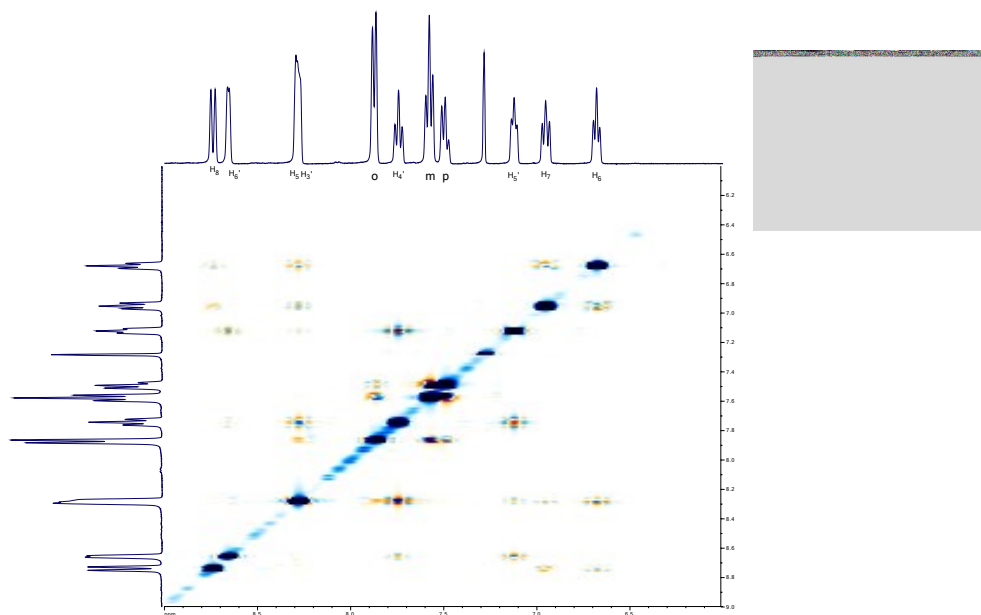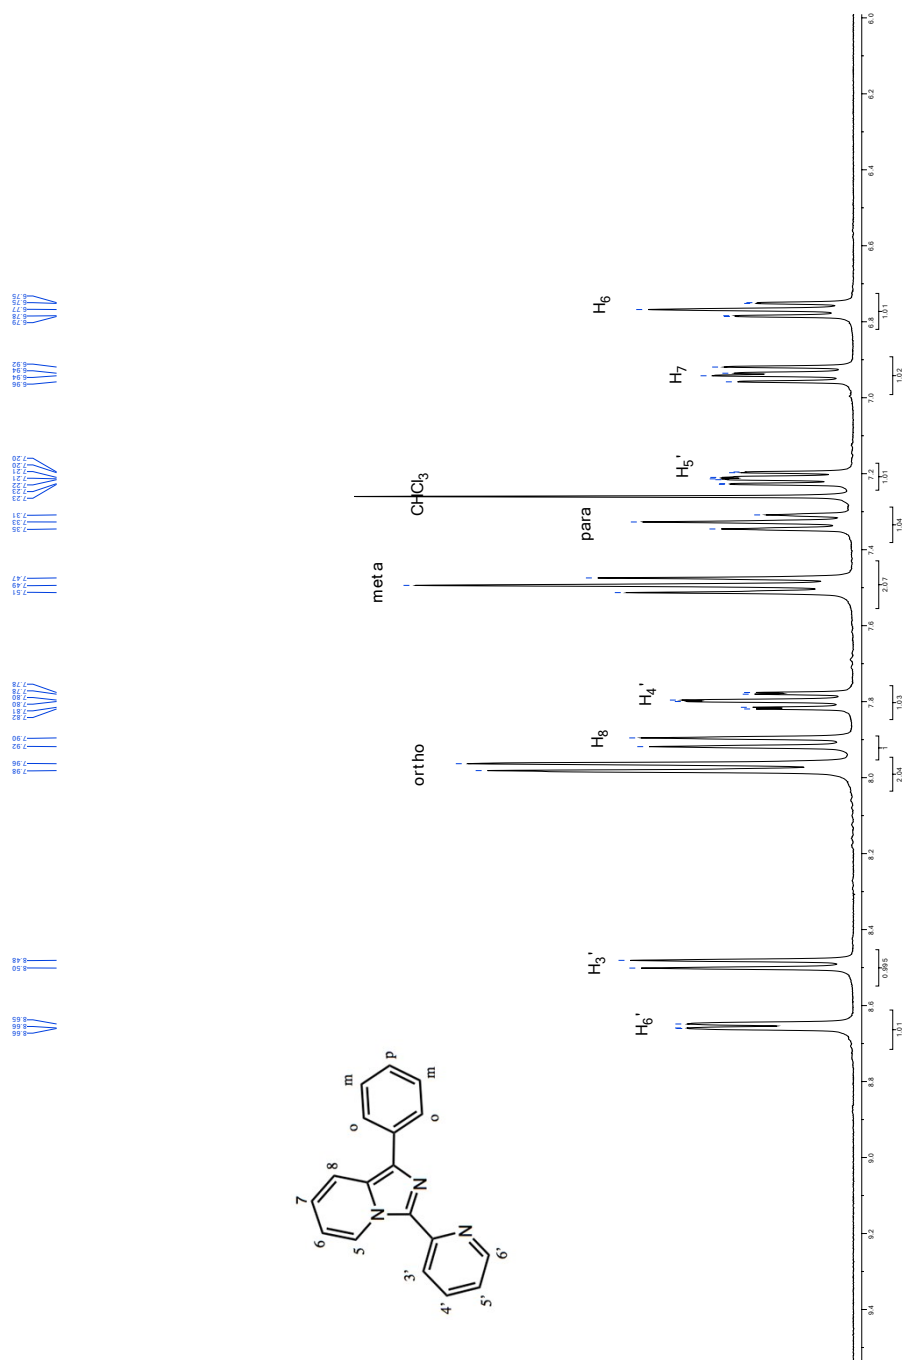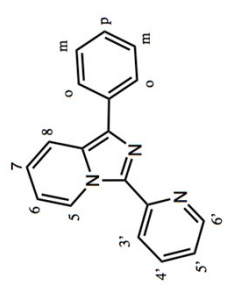

## Supporting Information

## Supporting Information

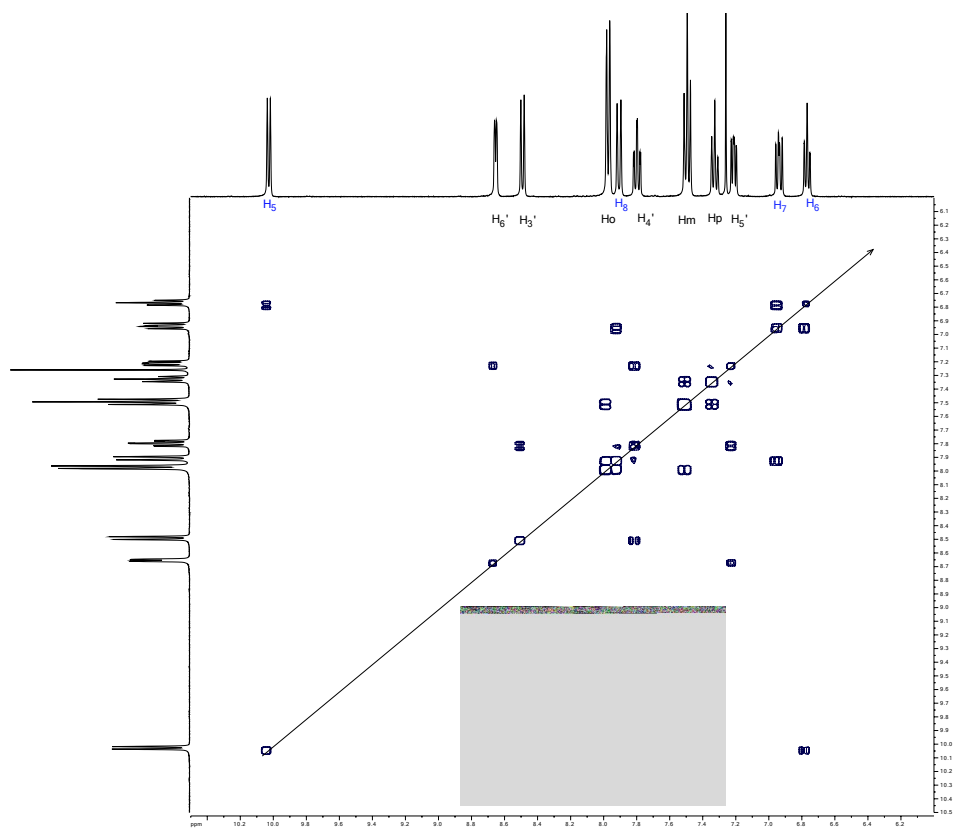

$^1\text{H}$ - $^1\text{H}$  COSY NMR spectrum of  $\text{L}^1$  in  $\text{CDCl}_3$

$^1\text{H}$ - $^1\text{H}$  NOESY NMR spectrum of  $\text{L}^1$  isomer in  $\text{CDCl}_3$

## 2. Crystallography

### *Crystallographic Method*

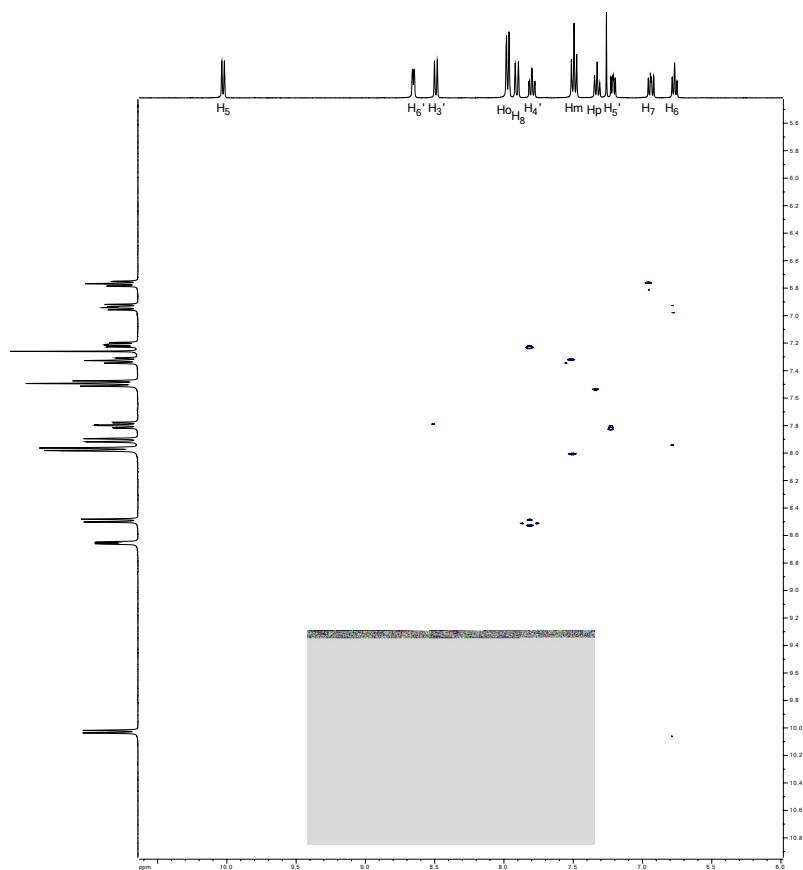

## Supporting Information

The crystal data for **5**, **8**, **10**, **11** and **14** are compiled in Tables S1-S4. Crystals of **5** were examined with an Xcalibur Gemini diffractometer, equipped with a Ruby CCD area detector and mirror-monochromated Mo K $\alpha$  radiation ( $\lambda = 0.71073 \text{ \AA}$ ). Crystals of **10** were examined using an Agilent Supernova diffractometer, equipped with CCD area detector and mirror-monochromated Mo K $\alpha$  radiation ( $\lambda = 0.71073 \text{ \AA}$ ). Crystals of **14** were examined with an Xcalibur Oxford Diffraction diffractometer, equipped with CCD area detector and mirror-monochromated Mo K $\alpha$  radiation ( $\lambda = 0.71073 \text{ \AA}$ ). Crystals of **8** and **11** were examined with a Rigaku XtalLAB AFC11 diffractometer equipped with a CCD area detector and graphite-monochromated Cu K $\alpha$  ( $\lambda = 1.54178 \text{ \AA}$ ) or Mo K $\alpha$  radiation ( $\lambda = 0.71073 \text{ \AA}$ ). Intensities were integrated from data recorded on  $1^\circ$  frames by  $\omega$  rotation. Cell parameters were refined from the observed positions of all strong reflections in each data set. A Gaussian grid face-indexed or multi-scan absorption correction with a beam profile was applied.<sup>1</sup> The structures were solved using SHELXS or SHELXT;<sup>2</sup> the datasets were refined by full-matrix least-squares on all unique  $F^2$  values,<sup>3</sup> with anisotropic displacement parameters for all non-hydrogen atoms, and with constrained riding hydrogen geometries;  $U_{\text{iso}}(\text{H})$  was set at 1.2 (1.5 for methyl groups) times  $U_{\text{eq}}$  of the parent atom. The largest features in final difference syntheses were close to heavy atoms and were of no chemical significance. CrysAlisPro<sup>1</sup> was used for control and integration, and SHELX<sup>2,3</sup> was employed through OLEX2<sup>4</sup> for structure solution and refinement, which was also used for molecular graphics. CCDC 2061441-2061445 contain the supplementary crystal data for this article. These data can be obtained free of charge from the Cambridge Crystallographic Data Centre via [www.ccdc.cam.ac.uk/data\\_request/cif](http://www.ccdc.cam.ac.uk/data_request/cif).

### *Structural characterisation*

The solid state X-ray structures of all heteroleptic complexes analysed in this study (**10**, **11** and **14**) all present minor components in which the two anionic ligands (methyl and chloride) are swapped. The positional disorder was clearly identified in each case and successfully modelled by refining the occupancies competitively. The models obtained for **10**, **11** and **14** are in good agreement with the spectroscopic data, wherein the isomers **10'**, **11'** and **14'** are present as minor components (15%, 5% and 15% respectively). Owing to the low occupancies of the minor isomers and large statistical uncertainty of their metric parameters, a rigorous comparison cannot be drawn with the main components.

Supporting Information

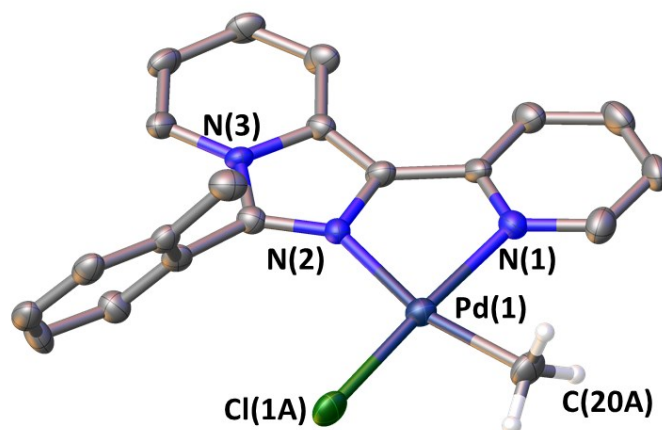

**Figure S2:** Molecular structure of **10'** with ellipsoids set at 50% probability level. Hydrogens have been omitted for clarity with the exception of those belonging to methyl group C(20A).

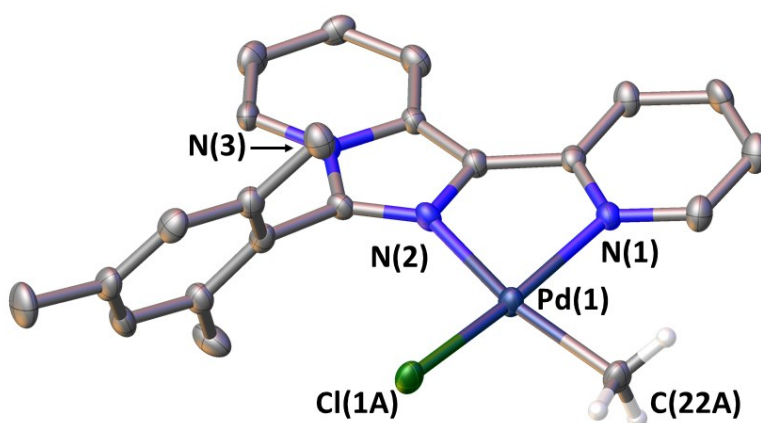

**Figure S3:** Molecular structure of **11'** with ellipsoids set at 50% probability level. Hydrogens have been omitted for clarity with the exception of those belonging to methyl group C(20A).

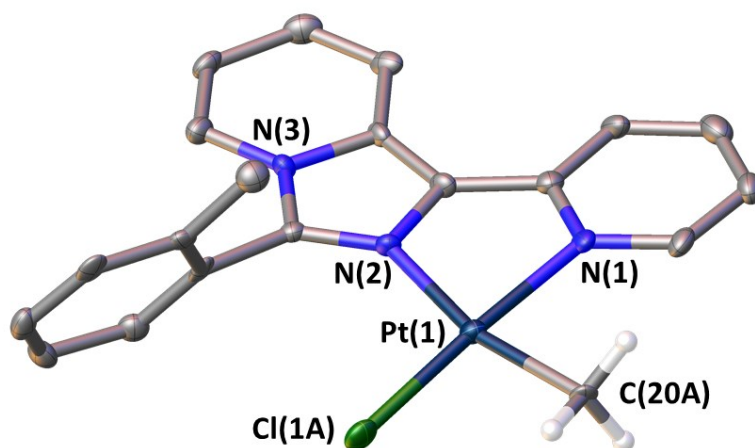

**Figure S4:** Molecular structure of **14'** with ellipsoids set at 50% probability level. Hydrogens have been omitted for clarity with the exception of those belonging to methyl group C(20A).



## Supporting Information

**Table S1.** Selected bond lengths (Å) and angles (°) for **10**, **11** and **14**

|                       | <b>10</b>  | <b>11</b>  | <b>14</b>  |
|-----------------------|------------|------------|------------|
| M–N1                  | 2.147(4)   | 2.148(3)   | 2.110(4)   |
| M–N2                  | 2.068(4)   | 2.055(3)   | 2.026(4)   |
| M–Cl1                 | 2.300(2)   | 2.3064(12) | 2.285(2)   |
| M–CH <sub>3</sub>     | 2.069(9)   | 2.049(5)   | 2.07(1)    |
| N1–M–N2               | 79.67(15)  | 78.94(12)  | 79.5(2)    |
| N1–M–Cl1              | 94.97(12)  | 95.32(9)   | 94.54(14)  |
| N2–M–Cl1              | 174.64(13) | 173.01(9)  | 173.96(14) |
| N1–M–CH <sub>3</sub>  | 172.5(3)   | 175.3(2)   | 173.9(4)   |
| N2–M–CH <sub>3</sub>  | 94.2(3)    | 96.44(12)  | 95.7(3)    |
| Cl1–M–CH <sub>3</sub> | 91.1(2)    | 89.22(14)  | 90.3(3)    |

**Table S2.** Selected bond lengths (Å) and angles (°) for **5** and **8**

|                   | <b>5</b>  | <b>8</b>   |
|-------------------|-----------|------------|
| M–N1              | 2.020(2)  | 2.028(3)   |
| M–N2              | 2.023(2)  | 2.029(3)   |
| M–Cl1             | 2.2896(8) | 2.2883(8)  |
| M–Cl2             | 2.2869(8) | 2.2961(10) |
| M–CH <sub>3</sub> | -         | -          |
| N1–M–N2           | 80.60(9)  | 80.44(11)  |
| N1–M–Cl1          | 94.19(7)  | 94.25(9)   |
| N1–M–Cl2          | 177.23(7) | 178.42(8)  |
| Cl1–M–Cl2         | 87.69(3)  | 87.31(3)   |
| N2–M–Cl1          | 174.63(7) | 174.60(7)  |
| N2–M–Cl2          | 94.47(7)  | 98.00(7)   |

## Supporting Information

**Table S3:** Crystallographic parameters for **5**, **8**, and **10**.

<sup>a</sup>Conventional  $R = \Sigma||F_o| - |F_c||/\Sigma|F_o|$ ;  $R_w = [\Sigma w(F_o^2 - F_c^2)^2/\Sigma w(F_o^2)^2]^{1/2}$ ;  $S = [\Sigma w(F_o^2 - F_c^2)^2/\text{no. data} - \text{no. params}]^{1/2}$  for all data.

|                                                                                                         | <b>5</b>                                                          | <b>8</b>                                                          | <b>10</b>                                           |
|---------------------------------------------------------------------------------------------------------|-------------------------------------------------------------------|-------------------------------------------------------------------|-----------------------------------------------------|
| Formula                                                                                                 | C <sub>18</sub> H <sub>13</sub> Cl <sub>2</sub> N <sub>3</sub> Pt | C <sub>19</sub> H <sub>15</sub> Cl <sub>2</sub> N <sub>3</sub> Pt | C <sub>20</sub> H <sub>18</sub> ClN <sub>3</sub> Pd |
| FW                                                                                                      | 537.30                                                            | 551.33                                                            | 442.22                                              |
| cryst size, mm                                                                                          | 0.04 x 0.10 x 0.25                                                | 0.05 x 0.10 x 0.10                                                | 0.07 x 0.12 x 0.14                                  |
| crystal syst                                                                                            | monoclinic                                                        | monoclinic                                                        | Orthorombic                                         |
| space group                                                                                             | <i>P2</i> <sub>1</sub> / <i>n</i>                                 | <i>P2</i> <sub>1</sub> / <i>c</i>                                 | <i>P2</i> <sub>1</sub> / <i>c</i>                   |
| <i>a</i> , Å                                                                                            | 7.48068(13)                                                       | 7.2451(1)                                                         | 6.7186(5)                                           |
| <i>b</i> , Å                                                                                            | 18.9967(3)                                                        | 11.8636(1)                                                        | 18.0115(11)                                         |
| <i>c</i> , Å                                                                                            | 11.6695(2)                                                        | 20.2553(2)                                                        | 14.8207(10)                                         |
| $\alpha$ , °                                                                                            | 90                                                                | 90                                                                | 90                                                  |
| $\beta$ , °                                                                                             | 103.136(2)                                                        | 99.331(1)                                                         | 101.194(7)                                          |
| $\gamma$ , °                                                                                            | 90                                                                | 90                                                                | 90                                                  |
| <i>V</i> , Å <sup>3</sup>                                                                               | 1614.94(5)                                                        | 1717.97(3)                                                        | 1759.4(2)                                           |
| <i>Z</i>                                                                                                | 4                                                                 | 4                                                                 | 4                                                   |
| $\rho_{\text{calcd}}$ , g cm <sup>3</sup>                                                               | 2.102                                                             | 2.132                                                             | 1.669                                               |
| $\mu$ , mm <sup>-1</sup>                                                                                | 9.023                                                             | 18.188                                                            | 1.214                                               |
| <i>F</i> (000)                                                                                          | 1016                                                              | 1048                                                              | 888                                                 |
| no. of reflections (unique)                                                                             | 21290 (4607)                                                      | 9235 (3102)                                                       | 6580 (3859)                                         |
| <i>S</i> <sup>a</sup>                                                                                   | 1.04                                                              | 1.05                                                              | 1.04                                                |
| <i>R</i> <sub>1</sub> ( <i>wR</i> <sub>2</sub> ) ( <i>F</i> <sup>2</sup> > 2σ( <i>F</i> <sup>2</sup> )) | 0.0227(0.0464)                                                    | 0.0243(0.0663)                                                    | 0.0541(0.1027)                                      |
| <i>R</i> <sub>int</sub>                                                                                 | 0.039                                                             | 0.030                                                             | 0.047                                               |
| min., max. diff map, e Å <sup>-3</sup>                                                                  | -0.85, 1.00                                                       | -1.19, 0.98                                                       | -0.89, 0.59                                         |

## Supporting Information

**Table S4:** Crystallographic parameters for **11** and **14**.

<sup>a</sup>Conventional  $R = \sum||F_o| - |F_c||/\sum|F_o|$ ;  $R_w = [\sum w(F_o^2 - F_c^2)^2/\sum w(F_o^2)^2]^{1/2}$ ;  $S = [\sum w(F_o^2 - F_c^2)^2/\text{no. data} - \text{no. params})]^{1/2}$  for all data.

|                                                                                                         | <b>11</b>                                           | <b>14</b>                                           |
|---------------------------------------------------------------------------------------------------------|-----------------------------------------------------|-----------------------------------------------------|
| Formula                                                                                                 | C <sub>22</sub> H <sub>22</sub> ClN <sub>3</sub> Pd | C <sub>20</sub> H <sub>18</sub> ClN <sub>3</sub> Pt |
| FW                                                                                                      | 470.27                                              | 530.91                                              |
| cryst size, mm                                                                                          | 0.06 x 0.08 x 0.11                                  | 0.19 x 0.23 x 0.36                                  |
| crystal syst                                                                                            | triclinic                                           | monoclinic                                          |
| space group                                                                                             | <i>P</i> -1                                         | <i>P</i> 2 <sub>1</sub> / <i>c</i>                  |
| <i>a</i> , Å                                                                                            | 8.6794(7)                                           | 6.6611(3)                                           |
| <i>b</i> , Å                                                                                            | 10.7831(9)                                          | 17.9170(7)                                          |
| <i>c</i> , Å                                                                                            | 10.8932(9)                                          | 14.6855(6)                                          |
| $\alpha$ , °                                                                                            | 73.015(8)                                           | 90                                                  |
| $\beta$ , °                                                                                             | 80.802(7)                                           | 101.376(4)                                          |
| $\gamma$ , °                                                                                            | 85.043(7)                                           | 90                                                  |
| <i>V</i> , Å <sup>3</sup>                                                                               | 961.65(14)                                          | 1718.24(13)                                         |
| <i>Z</i>                                                                                                | 2                                                   | 4                                                   |
| $\rho_{\text{calcd}}$ , g cm <sup>3</sup>                                                               | 1.624                                               | 2.052                                               |
| $\mu$ , mm <sup>-1</sup>                                                                                | 1.115                                               | 8.329                                               |
| <i>F</i> (000)                                                                                          | 476                                                 | 1016                                                |
| no. of reflections (unique)                                                                             | 10385 (4473)                                        | 8191 (3119)                                         |
| <i>S</i> <sup>a</sup>                                                                                   | 1.03                                                | 1.03                                                |
| <i>R</i> <sub>1</sub> ( <i>wR</i> <sub>2</sub> ) ( <i>F</i> <sup>2</sup> > 2σ( <i>F</i> <sup>2</sup> )) | 0.0434(0.0926)                                      | 0.0318(0.0586)                                      |
| <i>R</i> <sub>int</sub>                                                                                 | 0.050                                               | 0.040                                               |
| min., max. diff map, e Å <sup>-3</sup>                                                                  | -0.65, 0.59                                         | -1.30, 1.24                                         |

## 3. Computational Details

**Table S5.** Selected bond lengths, angles and dihedral for the complexes [Pt(L<sup>1</sup>)Cl<sub>2</sub>], [Pt(L<sup>2</sup>)Cl<sub>2</sub>] and [Pt(L<sup>4</sup>)Cl<sub>2</sub>].

| Parameter <sup>a</sup> | [Pt(L <sup>1</sup> )Cl <sub>2</sub> ] |        | [Pt(L <sup>2</sup> )Cl <sub>2</sub> ] |        | [Pt(L <sup>4</sup> )Cl <sub>2</sub> ] |        |
|------------------------|---------------------------------------|--------|---------------------------------------|--------|---------------------------------------|--------|
|                        | Exptl. <sup>b</sup>                   | Calcd. | Exptl. <sup>b</sup>                   | Calcd. | Exptl. <sup>b</sup>                   | Calcd. |
| Pt(II)-N(1)            | 2.023                                 | 2.070  | 2.026                                 | 2.056  | 2.029                                 | 2.069  |
| Pt (II)-N(2)           | 2.020                                 | 2.072  | 2.110                                 | 2.074  | 2.028                                 | 2.068  |
| Pt (II)-Cl(1)          | 2.290                                 | 2.317  | 2.285                                 | 2.319  | 2.288                                 | 2.319  |
| Pt (II)-Cl(2)          | 2.287                                 | 2.320  | 2.217                                 | 2.319  | 2.296                                 | 2.327  |
| N(1)-Pt(II)-N(2)       | 80.60                                 | 79.19  | 79.48                                 | 79.29  | 80.44                                 | 79.17  |
| N(1)-Pt(II)-Cl(2)      | 97.47                                 | 98.03  | 101.87                                | 97.17  | 98.00                                 | 98.89  |
| N(2)-Pt(II)-Cl(1)      | 94.19                                 | 93.84  | 95.54                                 | 94.09  | 94.24                                 | 93.83  |
| Cl(1)-Pt(II)-Cl(2)     | 87.69                                 | 88.88  | 84.05                                 | 89.45  | 87.31                                 | 88.11  |
| N(1)-X(α)-X(β)-X(γ)    | 66.99                                 | 58.45  | 63.68                                 | 83.04  | 96.126                                | 107.53 |
| X(α)-X(β)-X(γ)         | --                                    | --     | --                                    | --     | 113.57                                | 112.94 |
| X(α)-X(β)-X(γ)-X(δ)    | --                                    | --     | --                                    | --     | 132.60                                | 122.08 |

<sup>a</sup> Distances in Å and angles in degrees. <sup>b</sup> structural data from this work.

#### 4. References

1. *CrysAlisPRO*, version 39.27b; Oxford Diffraction /Agilent Technologies UK Ltd: Yarnton, U.K., 2017
2. G. M. Sheldrick, *Acta Crystallogr., Sect. A.*, 2008, **64**, 112.
3. G. M. Sheldrick, *Acta Crystallogr., Sect. C*, 2015, **71**, 3.
4. O. V. Dolomanov, L. J. Bourhis, R. J. Gildea, J. A. K. Howard, H. Puschmann, *J. Appl. Crystallogr.*, 2009, **42**, 339.
